# Supplementary material
Source: PubMed Central journal article supplement (PMC4988318)

**Supplementary Table 2.** Fold changes in gene expression by RT-PCR array in SVZ tissue and asyctocyte cultures after TMEV infection. Values are for averaged triplicate samples. Table shows genes present on SABiosciences RT-PCR PAMM-077. Gene changes shown are TMEV stimulated over control. Values for genes with greater than 4-fold changes are shown in bold.

| Gene Name                                 | Gene symbol | Differential expression (fold) : TMEV/Control |              |              |                |
|-------------------------------------------|-------------|-----------------------------------------------|--------------|--------------|----------------|
|                                           |             | B6 +/+                                        | B6 -/-       | SJL +/+      | SVZ astrocytes |
| B-cell leukaemia/Lymphoma 6               | Bcl6        | 1.1                                           | 1.2          | 1.1          | 1.8            |
| Complement component 3                    | C3          | <b>66.8</b>                                   | <b>82.3</b>  | <b>4.2</b>   | 0.7            |
| Complement component 3a receptor 1        | C3ar1       | <b>13.1</b>                                   | <b>7.2</b>   | <b>5.7</b>   | <b>43.1</b>    |
| Complement component 4B                   | C4b         | <b>11.3</b>                                   | <b>12.3</b>  | <b>4.9</b>   | 0.7            |
| Chemokine (C-C) motif ligand 1            | Ccl1        | <b>11.8</b>                                   | 3.1          | 2.9          | 0.6            |
| Chemokine (C-C) motif ligand 11           | Ccl11       | <b>20.4</b>                                   | 2.9          | 1.1          | 0.6            |
| Chemokine (C-C) motif ligand 12           | Ccl12       | <b>63.9</b>                                   | <b>45.1</b>  | <b>45.5</b>  | <b>349</b>     |
| Chemokine (C-C) motif ligand 17           | Ccl17       | 2.4                                           | 2.1          | 0.9          | 2.8            |
| Chemokine (C-C) motif ligand 19           | Ccl19       | <b>8.6</b>                                    | <b>12.8</b>  | 3.4          | 1.6            |
| Chemokine (C-C) motif ligand 2            | Ccl2        | <b>277.6</b>                                  | <b>187.9</b> | <b>43.5</b>  | <b>4.6</b>     |
| Chemokine (C-C) motif ligand 20           | Ccl20       | 1.6                                           | 1.3          | 1.1          | 1.6            |
| Chemokine (C-C) motif ligand 22           | Ccl22       | <b>14.1</b>                                   | <b>13.7</b>  | <b>2.2</b>   | 0.6            |
| Chemokine (C-C) motif ligand 24           | Ccl24       | 1.1                                           | 1.3          | 1.5          | 0.6            |
| Chemokine (C-C) motif ligand 25           | Ccl25       | 0.8                                           | 0.7          | 1.0          | 0.9            |
| Chemokine (C-C) motif ligand 3            | Ccl3        | <b>6.9</b>                                    | <b>5.7</b>   | 3.6          | <b>32.9</b>    |
| Chemokine (C-C) motif ligand 4            | Ccl4        | <b>5.8</b>                                    | <b>5.9</b>   | 2.3          | <b>81</b>      |
| Chemokine (C-C) motif ligand 5            | Ccl5        | <b>257.8</b>                                  | <b>376.8</b> | <b>639.4</b> | <b>37.3</b>    |
| Chemokine (C-C) motif ligand 7            | Ccl7        | <b>354.3</b>                                  | <b>142.8</b> | <b>99.5</b>  | <b>13.4</b>    |
| Chemokine (C-C) motif ligand 8            | Ccl8        | <b>29.2</b>                                   | <b>65.2</b>  | <b>148.8</b> | <b>26.8</b>    |
| Chemokine (C-C) motif receptor 1          | Ccr1        | <b>6.9</b>                                    | <b>8.4</b>   | 2.3          | <b>31.1</b>    |
| Chemokine (C-C) motif receptor 2          | Ccr2        | <b>17.3</b>                                   | <b>34.3</b>  | <b>6.3</b>   | 1.2            |
| Chemokine (C-C) motif receptor 3          | Ccr3        | <b>6.4</b>                                    | <b>10.4</b>  | 3.0          | 2.9            |
| Chemokine (C-C) motif receptor 4          | Ccr4        | <b>4.0</b>                                    | 3.2          | 2.0          | 0.6            |
| Chemokine (C-C) motif receptor 7          | Ccr7        | <b>4.2</b>                                    | 1.5          | 1.6          | 0.6            |
| CD14 antigen                              | Cd40        | <b>16.7</b>                                   | <b>7.4</b>   | <b>5.2</b>   | <b>12.4</b>    |
| CD40 antigen                              | Cd40lg      | <b>10.8</b>                                   | 3.8          | <b>12.1</b>  | 0.6            |
| CD40 ligand                               | Cebpb       | <b>4.9</b>                                    | 2.4          | 2.0          | 1.3            |
| CCAAAT/enhancer binding protein, beta     | Crp         | 1.6                                           | 1.3          | 1.1          | 0.6            |
| C-reactive protein                        | Csfl        | 2.8                                           | <b>4.1</b>   | 1.4          | 3.8            |
| Colony stimulating factor 1 (macrophage)  | Cxcl1       | <b>6.0</b>                                    | 2.0          | 1.1          | <b>5.6</b>     |
| Chemokine (C-X-C motif) ligand 1          | Cxcl10      | <b>798.0</b>                                  | <b>389.9</b> | <b>70.9</b>  | <b>139.1</b>   |
| Chemokine (C-X-C motif) ligand 11         | Cxcl11      | <b>46.8</b>                                   | <b>26.8</b>  | <b>61.3</b>  | <b>17.7</b>    |
| Chemokine (C-X-C motif) ligand 2          | Cxcl2       | 3.3                                           | 2.2          | 1.2          | <b>22.3</b>    |
| Chemokine (C-X-C motif) ligand 3          | Cxcl3       | 1.6                                           | 1.3          | 1.1          | <b>12.6</b>    |
| Chemokine (C-X-C motif) ligand 5          | Cxcl5       | 1.5                                           | 0.4          | 1.6          | <b>118.6</b>   |
| Chemokine (C-X-C motif) ligand 6          | Cxcl9       | <b>626.0</b>                                  | <b>470.3</b> | <b>254.8</b> | <b>11</b>      |
| Chemokine (C-X-C motif) ligand receptor 4 | Cxcr4       | 1.7                                           | 1.6          | 1.8          | 0.3            |
| Fas ligand (TNF superfamily, member 6)    | Fasl        | <b>39.8</b>                                   | <b>13.9</b>  | <b>7.1</b>   | 0.5            |
| Fms-related tyrosine kinase 3 ligand      | Flt3l       | 3.6                                           | 3.1          | 3.1          | 2.6            |
| FBJ osteosarcoma oncogene                 | Fos         | 1.6                                           | 0.9          | 1.3          | 2.3            |
| Histone deacetylase 4                     | Hdac4       | 0.7                                           | 1.8          | 0.7          | 0.9            |
| Interferon gamma                          | Ifng        | <b>25.8</b>                                   | <b>19.4</b>  | <b>6.4</b>   | 0.6            |

| Gene Name                                                          | Gene symbol | Differential expression (fold) : TMEV/Control |        |         |                |
|--------------------------------------------------------------------|-------------|-----------------------------------------------|--------|---------|----------------|
|                                                                    |             | B6 +/+                                        | B6 -/- | SJL +/+ | SVZ astrocytes |
| Interleukin 10                                                     | Il10        | 5.8                                           | 5.2    | 13.9    | 3.4            |
| Interleukin 10 receptor beta                                       | Il10rb      | 2.2                                           | 3.4    | 1.4     | 1.8            |
| Interleukin 8                                                      | Il18        | 0.8                                           | 1.7    | 1.0     | 0.6            |
| Interleukin 8 receptor accessory protein                           | Il18rap     | 12.3                                          | 13.8   | 2.5     | 5.2            |
| Interleukin 1 alpha                                                | Il1a        | 4.4                                           | 8.6    | 4.7     | 12.9           |
| Interleukin 1 beta                                                 | Il1b        | 30.7                                          | 31.7   | 8.3     | 4.6            |
| Interleukin                                                        | Il1f10      | 1.6                                           | 1.3    | 1.1     | 0.6            |
| Interleukin 1 receptor, type I                                     | Il1r1       | 1.7                                           | 1.2    | 1.0     | 1.7            |
| Interleukin 1 receptor accessory protein                           | Il1rap      | 0.9                                           | 1.0    | 0.7     | 0.3            |
| Interleukin 1 receptor antagonist                                  | Il1rn       | 3.7                                           | 3.0    | 2.0     | 8.3            |
| Interleukin 22                                                     | Il22        | 1.6                                           | 1.3    | 1.1     | 0.6            |
| Interleukin 22 receptor accessory protein                          | Il22ra2     | 1.6                                           | 1.3    | 1.1     | 0.6            |
| Interleukin 23, alpha subunit p19                                  | Il23a       | 1.6                                           | 1.3    | 1.1     | 0.6            |
| Interleukin 23 receptor                                            | Il23r       | 1.6                                           | 1.3    | 1.1     | 0.8            |
| Interleukin 6                                                      | Il6         | 3.9                                           | 2.2    | 2.3     | 73             |
| Interleukin 6 receptor, alpha                                      | Il6ra       | 1.9                                           | 2.3    | 1.0     | 0.2            |
| Interleukin 7                                                      | Il7         | 1.7                                           | 1.3    | 1.1     | 2.3            |
| Interleukin 8 receptor alpha                                       | Il8ra       | 1.6                                           | 1.3    | 1.1     | 0.6            |
| Interleukin 8 receptor beta                                        | Il8rb       | 1.6                                           | 1.3    | 1.1     | 0.6            |
| Interleukin 9                                                      | Il9         | 1.4                                           | 1.4    | 1.1     | 0.6            |
| Integrin beta 2                                                    | Itgb2       | 8.0                                           | 6.4    | 6.3     | 29.6           |
| Kininogen 1                                                        | Kng1        | 1.6                                           | 1.3    | 1.1     | 0.9            |
| Lymphotoxin A                                                      | Lta         | 1.7                                           | 2.1    | 2.1     | 0.6            |
| Lymphotoxin B                                                      | Ltb         | 15.1                                          | 13.9   | 8.0     | 1.6            |
| Lymphocyte antigen 96                                              | Ly96        | 3.7                                           | 4.1    | 1.7     | 1.6            |
| Myeloid differentiation primary response gene 88                   | Myd88       | 3.9                                           | 2.6    | 2.0     | 1.7            |
| Nuclear factor of activated T-cells                                | Nfatc3      | 0.9                                           | 2.7    | 1.4     | 1.5            |
| Nuclear factor of kappa polypeptide gene enhancer in B-cells, p105 | Nfkb1       | 1.6                                           | 2.5    | 2.1     | 2.1            |
| Nitric oxide synthase 2, inducible                                 | Nos2        | 2.5                                           | 0.9    | 0.5     | 0.4            |
| Nuclear receptor subfamily 3, group C, member 1                    | Nr3c1       | 0.7                                           | 1.6    | 0.9     | 0.7            |
| Receptor (TNFRSF)-interacting serine-threonine kinase 2            | Ripk2       | 1.0                                           | 2.0    | 1.5     | 6.3            |
| Toll-interleukin 1 receptor domain-containing adaptor protein      | Tirap       | 1.7                                           | 1.2    | 1.5     | 1.3            |
| Toll-like receptor 1                                               | Tlr1        | 5.1                                           | 9.3    | 2.6     | 0.7            |
| Toll-like receptor 2                                               | Tlr2        | 13.6                                          | 19.6   | 8.6     | 7.6            |
| Toll-like receptor 3                                               | Tlr3        | 2.2                                           | 3.7    | 1.2     | 1.5            |
| Toll-like receptor 4                                               | Tlr4        | 3.1                                           | 3.9    | 1.5     | 1.5            |
| Toll-like receptor 5                                               | Tlr5        | 1.0                                           | 1.5    | 1.0     | 5.1            |
| Toll-like receptor 6                                               | Tlr6        | 2.4                                           | 5.2    | 2.0     | 1.9            |
| Toll-like receptor 7                                               | Tlr7        | 3.3                                           | 5.1    | 3.2     | 24.4           |

| Gene Name | Gene symbol | Differential expression (fold) : TMEV/Control |        |         |                |
|-----------|-------------|-----------------------------------------------|--------|---------|----------------|
|           |             | B6 +/+                                        | B6 -/- | SJL +/+ | SVZ astrocytes |
| Tnf       | 21.1        | 17.5                                          | 6.1    | 6.13    | 11.8           |
| Tnfsf14   | 11.3        | 10.7                                          | 4.4    | 4.4     | 0.5            |
| Tollip    | 0.7         | 1.7                                           | 0.9    | 0.87    | 1.9            |

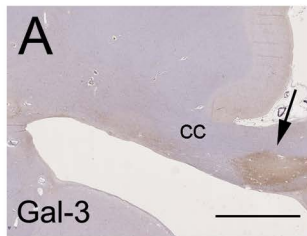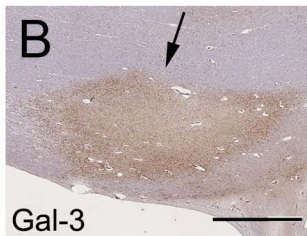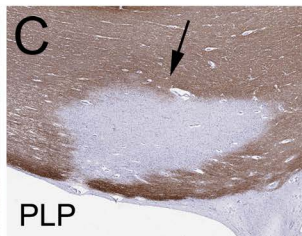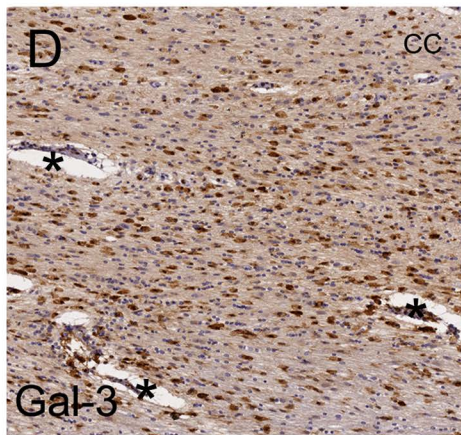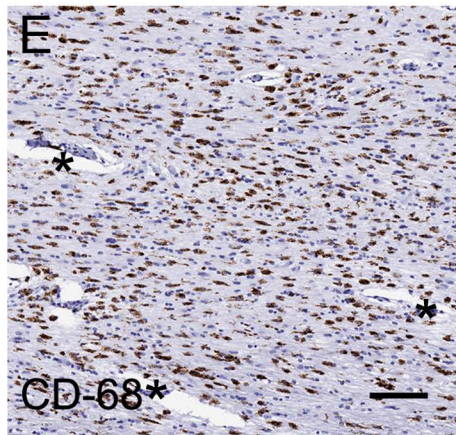

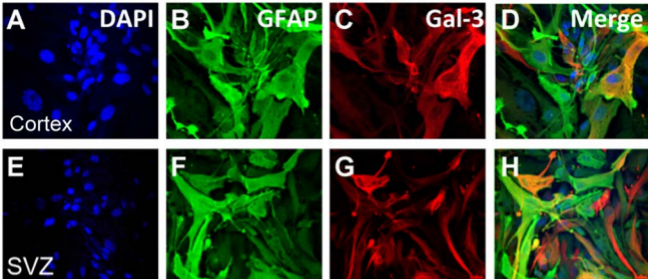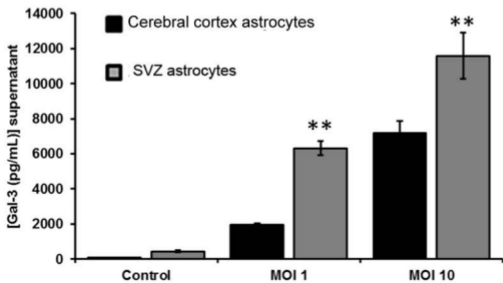

# Macrophage Chemotaxis Assay

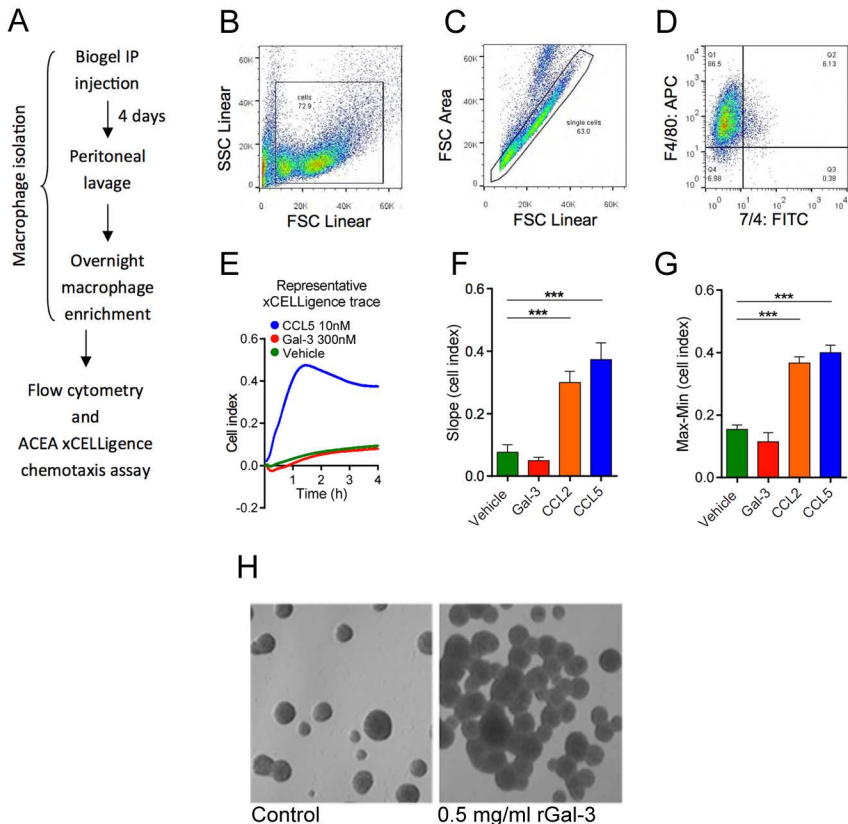

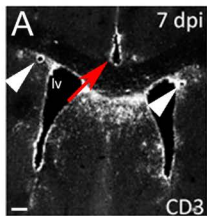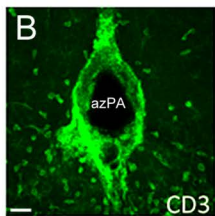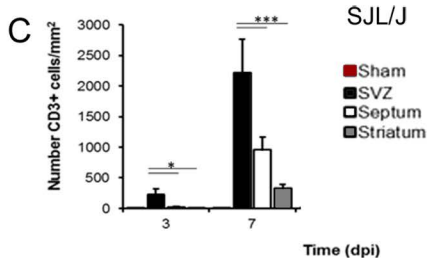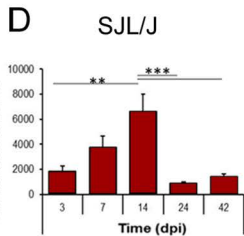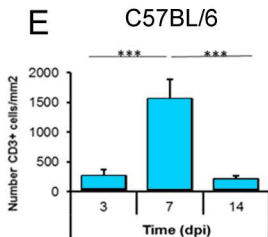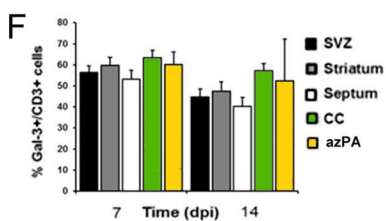

Supplement: NIHMS715071-supplement-Supp_Table_S1___FigureS1-S4.pdf [file NIHMS715071-supplement-Supp_Table_S1___FigureS1-S4.pdf]
